# Supplementary material for: McAPRR2: The Key Regulator of Domesticated Pericarp Color in Bitter Gourd
Source: MDPI journal article supplement (doi:10.3390/plants12203585), 2023-10-16
Supplement: s1 [file s1]

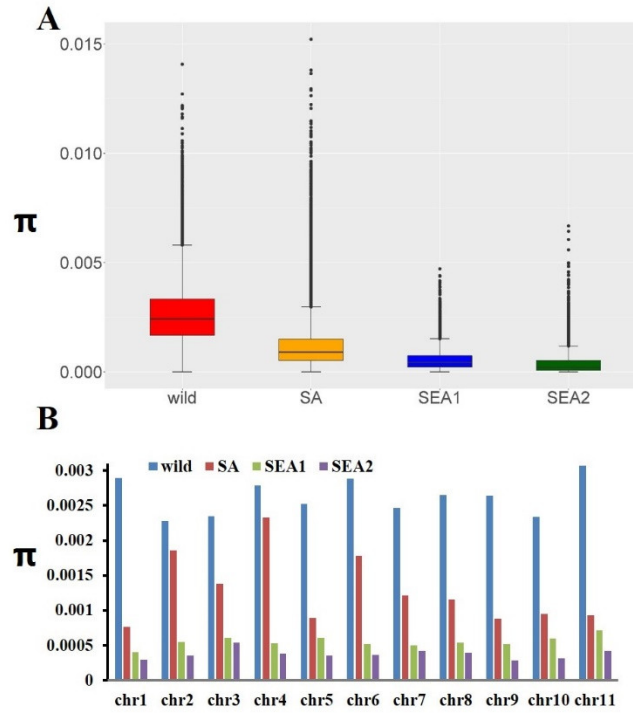

**Figure S1.** Nucleotide diversity comparison among different genetic groups. (A) Comparison of nucleotide diversity within wild, SA, SEA1, and SEA2 populations. (B) Nucleotide diversity across 11 chromosomes in wild, SA, SEA1, and SEA2.

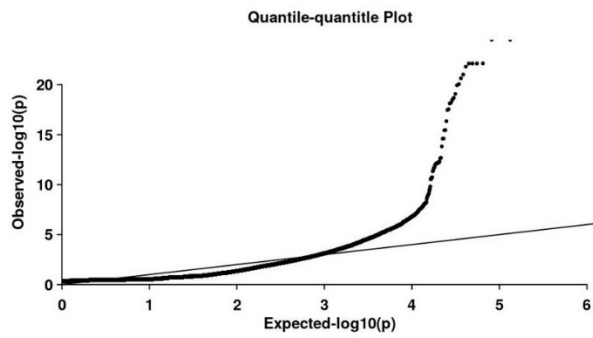

**Figure S2.** Quantile-Quantile plot of genome-wide association study (GWAS) analysis of pericarp color.

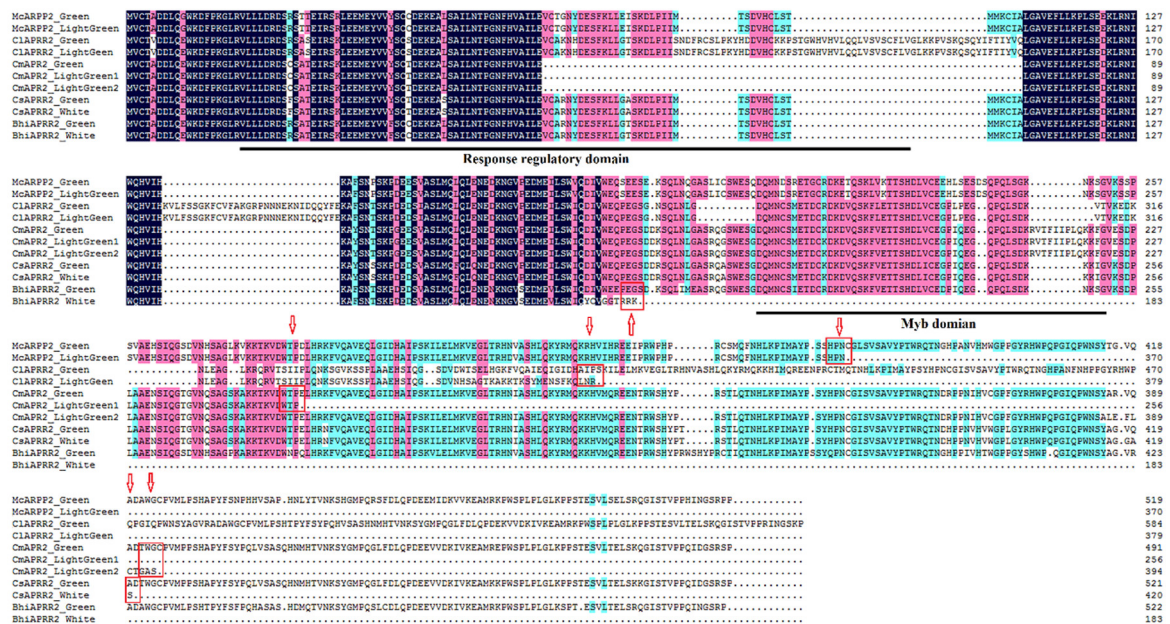

**Figure S3.** Multi-sequence alignment based on APRR2 protein sequence in the *Cucurbitaceae*. *APRR2* contains both the Response regulatory domain and the Myb domain.

**Table S1.** Sequencing summary for 47 *M. charantia* accessions.

| ID   | Name          | Clean reads<br>(bp) | Depth* | Color       | Genetic<br>group | Admixture |
|------|---------------|---------------------|--------|-------------|------------------|-----------|
| KG10 | Jan-89        | 5,209,685,252       | 17.19  | Light green | SEA1             | N         |
| KG11 | Changbai No.1 | 4,300,659,095       | 14.19  | Light green | SEA1             | N         |
| KG13 | Xiang         | 4,590,777,525       | 15.15  | Light green | SEA1             | N         |
| KG14 | Kan           | 4,689,050,226       | 15.48  | Green       | SEA1             | N         |
| KG15 | NERCV No.9    | 4,528,214,073       | 14.94  | Light green | SEA1             | Y         |
| KG16 | Qingpi        | 4,267,382,512       | 14.08  | Light green | SEA2             | N         |
| KG17 | Lvren         | 4,380,248,163       | 14.46  | Light green | SEA1             | Y         |
| KG18 | Changlv No.1  | 4,699,558,314       | 15.51  | Green       | SEA1             | N         |
| KG19 | Changlv No.2  | 3,975,598,921       | 13.12  | Green       | SEA1             | N         |
| KG20 | NERCV No.10   | 4,229,886,464       | 13.96  | Light green | SEA1             | N         |
| KG21 | Hengfeng      | 5,778,770,561       | 19.07  | Light green | SEA1             | N         |
| KG23 | Bai           | 4,856,802,780       | 16.03  | White       | SEA1             | N         |
| KG24 | Yangzizhou    | 4,593,662,266       | 15.16  | Light green | SEA1             | N         |
| KG25 | Yuan          | 4,694,252,976       | 15.49  | Green       | SEA1             | N         |
| KG26 | Changbai      | 5,745,344,037       | 18.96  | White       | SEA1             | N         |
| KG27 | Tongbai       | 4,369,213,380       | 14.42  | Light green | SEA1             | N         |
| KG28 | Xinyang       | 5,052,238,602       | 16.67  | Light green | SEA1             | N         |
| KG29 | NERCV No.11   | 4,182,254,688       | 13.80  | Green       | SA               | N         |
| KG31 | Gongyi        | 4,537,246,673       | 14.97  | Green       | SEA1             | N         |
| KG32 | Dabai         | 4,627,846,790       | 15.27  | White       | SEA1             | N         |
| KG33 | Lengjiang     | 5,334,521,218       | 17.61  | Light green | SEA1             | N         |
| KG34 | Xingao No.1   | 4,754,862,067       | 15.69  | Light green | SEA2             | N         |
| KG35 | Lanshan       | 5,349,894,559       | 17.66  | White       | SEA1             | Y         |
| KG36 | Cuiyou No.2   | 5,341,532,970       | 17.63  | Dark green  | SEA1             | N         |
| KG37 | Darou No.2    | 5,006,215,869       | 16.52  | Light green | SEA2             | N         |
| KG38 | Jiaqing No.6  | 4,850,821,784       | 16.01  | Light green | SEA2             | N         |
| KG39 | NERCV No.1    | 4,505,888,472       | 14.87  | Light green | SEA1             | N         |
| KG40 | NERCV No.2    | 4,894,032,471       | 16.15  | Light green | SEA1             | N         |
| KG41 | NERCV No.3    | 5,515,755,746       | 18.20  | Light green | SEA1             | N         |
| KG42 | NERCV No.4    | 4,201,646,489       | 13.87  | Green       | SEA1             | N         |
| KG43 | NERCV No.5    | 4,652,197,245       | 15.35  | Light green | SEA1             | Y         |
| KG44 | NERCV No.6    | 4,845,436,237       | 15.99  | Light green | SEA1             | N         |
| KG45 | NERCV No.7    | 4,244,683,704       | 14.01  | Light green | SEA1             | N         |
| KG46 | Liangku1403   | 4,993,902,241       | 16.48  | Light green | SEA1             | N         |
| KG47 | Liangku1405   | 4,425,910,652       | 14.61  | Light green | SEA1             | N         |
| KG48 | Liangku1406   | 4,052,142,339       | 13.37  | Light green | SEA2             | Y         |
| KG49 | Liangku1401   | 4,414,675,512       | 14.57  | Light green | SEA1             | Y         |
| KG50 | Gedalv        | 4,800,192,386       | 15.84  | Green       | SEA1             | N         |
| KG51 | Liangku1402   | 3,991,013,922       | 13.17  | Light green | SEA2             | Y         |
| KG52 | Panduola      | 4,166,535,486       | 13.75  | Light green | SEA1             | Y         |
| KG53 | Guinongkeyu   | 5,766,039,438       | 19.03  | Light green | SEA2             | N         |

|             |             |                |       |             |      |   |
|-------------|-------------|----------------|-------|-------------|------|---|
|             | No.1        |                |       |             |      |   |
| KG54        | Guangliang  | 4,470,736,491  | 14.76 | Dark green  | SEA1 | N |
|             | No.2        |                |       |             |      |   |
| KG55        | Fenglv      | 4,533,542,368  | 14.96 | Light green | SEA2 | N |
|             | Guangliang  |                |       |             |      |   |
| KG56        | No.3        | 5,369,234,129  | 17.72 | Light green | SEA1 | Y |
| KG57        | NERCV No.8  | 4,964,457,059  | 16.38 | Light green | SEA1 | Y |
| KG58        | MC1-6-12    | 4,979,619,399  | 16.43 | Light green | SEA2 | N |
|             | Guinongkeyu |                |       |             |      |   |
| KG59        | No.2        | 5,162,680,178  | 17.04 | Light green | SEA2 | N |
| SRR10309996 | AVBG1656    | 5,336,644,200  | 17.61 | Green       | SA   | N |
| SRR10309997 | AVBG1655    | 5,096,781,900  | 16.82 | Green       | SA   | N |
| SRR10309998 | AVBG1653    | 5,711,358,900  | 18.85 | Green       | SA   | N |
| SRR10310000 | AVBG1325    | 4,963,381,800  | 16.38 | Green       | SA   | N |
| SRR10310001 | VI051072    | 11,074,473,000 | 36.55 | Green       | SEA1 | Y |
| SRR10310002 | VI050202    | 17,986,629,000 | 59.36 | Green       | wild | N |
| SRR10310003 | VI050201    | 14,550,581,700 | 48.02 | Green       | wild | N |
| SRR10310004 | VI050194    | 17,124,514,800 | 56.52 | Green       | wild | N |
| SRR10310005 | VI050164    | 14,222,486,100 | 46.94 | Green       | wild | N |
| SRR10310006 | VI050146    | 13,873,333,800 | 45.79 | Green       | wild | N |
| SRR10310007 | VI050132    | 15,541,261,800 | 51.29 | Green       | wild | Y |
| SRR10310008 | VI050130    | 14,436,072,000 | 47.65 | Green       | wild | Y |
| SRR10310009 | VI048924    | 13,048,854,300 | 43.07 | Green       | wild | Y |
| SRR10310010 | VI047624    | 13,209,138,600 | 43.60 | Green       | wild | N |
| SRR10310011 | AVBG1322    | 5,603,495,100  | 18.49 | Green       | SA   | N |
| SRR10310012 | VI047622    | 14,259,361,200 | 47.06 | Green       | wild | N |
| SRR10310013 | VI039908    | 13,750,800,600 | 45.38 | Green       | SA   | Y |
| SRR10310014 | CRL003      | 13,643,767,800 | 45.03 | Green       | wild | N |
| SRR10310015 | CRL002      | 18,242,415,600 | 60.21 | Green       | wild | N |
| SRR10310016 | CRL001      | 12,088,693,800 | 39.90 | Green       | wild | N |
| SRR10310017 | THMC95      | 5,871,930,300  | 19.38 | Green       | SA   | N |
| SRR10310018 | THMC629     | 4,920,527,700  | 16.24 | Light green | SEA2 | N |
| SRR10310019 | THMC600     | 5,133,291,600  | 16.94 | Light green | SEA2 | N |
| SRR10310020 | THMC599     | 4,921,120,200  | 16.24 | Light green | SEA2 | N |
| SRR10310021 | THMC594     | 4,387,076,400  | 14.48 | Light green | SEA2 | N |
| SRR10310022 | AVBG1321    | 6,459,704,700  | 21.32 | Green       | SA   | N |
| SRR10310023 | THMC549     | 5,519,676,900  | 18.22 | Green       | SEA1 | N |
| SRR10310024 | THMC542     | 5,320,039,200  | 17.56 | Dark green  | SEA1 | N |
| SRR10310025 | THMC53-2    | 5,432,392,200  | 17.93 | Green       | SEA1 | N |
| SRR10310026 | THMC532     | 5,755,887,900  | 19.00 | Light green | SEA2 | N |
| SRR10310027 | THMC522     | 5,478,624,000  | 18.08 | Light green | SEA2 | N |
| SRR10310028 | THMC519     | 7,101,306,300  | 23.44 | Light green | SEA1 | N |
| SRR10310029 | THMC518     | 6,431,168,400  | 21.23 | Light green | SEA1 | N |
| SRR10310030 | THMC483     | 4,529,352,900  | 14.95 | Green       | SA   | N |

|             |              |               |       |              |      |   |
|-------------|--------------|---------------|-------|--------------|------|---|
| SRR10310031 | THMC423      | 5,976,345,300 | 19.72 | Green        | SA   | N |
| SRR10310032 | THMC422      | 4,822,162,500 | 15.92 | Green        | SA   | N |
| SRR10310033 | AVBG1313     | 5,786,489,400 | 19.10 | Light green  | SEA2 | N |
| SRR10310034 | THMC421      | 5,132,457,000 | 16.94 | Green        | SA   | N |
| SRR10310035 | THMC42       | 5,284,981,200 | 17.44 | Medium green | SEA1 | N |
| SRR10310036 | THMC406      | 5,661,171,900 | 18.68 | Light green  | SEA1 | N |
| SRR10310037 | THMC378      | 5,558,019,900 | 18.34 | Light green  | SA   | N |
| SRR10310038 | THMC370      | 5,618,973,000 | 18.54 | Light green  | SEA1 | N |
| SRR10310039 | THMC348      | 4,994,664,300 | 16.48 | Green        | SA   | N |
| SRR10310040 | THMC33       | 5,711,089,800 | 18.85 | Dark green   | SEA1 | N |
| SRR10310041 | THMC30       | 6,411,795,300 | 21.16 | Green        | SEA1 | N |
| SRR10310042 | THMC219      | 5,534,163,000 | 18.27 | Green        | SA   | N |
| SRR10310043 | THMC179      | 5,239,254,600 | 17.29 | White        | SA   | N |
| SRR10310044 | AVBG1311     | 5,431,794,300 | 17.93 | Light green  | SEA2 | N |
| SRR10310045 | THMC170      | 5,454,806,100 | 18.00 | Green        | wild | N |
| SRR10310046 | THMC167      | 4,494,262,500 | 14.83 | Dark green   | SA   | N |
| SRR10310047 | THMC156      | 4,897,944,900 | 16.17 | Green        | SA   | N |
| SRR10310048 | THMC153      | 7,086,205,200 | 23.39 | Green        | wild | N |
| SRR10310049 | THMC149      | 7,017,816,000 | 23.16 | Green        | SA   | N |
| SRR10310050 | THMC145      | 5,285,817,900 | 17.45 | Medium green | SA   | N |
| SRR10310051 | THMC144      | 4,487,121,600 | 14.81 | Green        | SA   | N |
| SRR10310052 | THMC143      | 5,077,317,300 | 16.76 | Medium green | SA   | N |
| SRR10310053 | THMC113      | 5,359,237,200 | 17.69 | Green        | wild | N |
| SRR10310054 | THMC 105-1-1 | 6,330,073,800 | 20.89 | Green        | SA   | N |
| SRR10310055 | AVBG1308     | 5,377,929,300 | 17.75 | Medium green | SEA1 | N |

**Table S2.** Pairwise *Fst* comparisons among the genetic groups.

| Group | SA   | SEA1 | SEA2 |
|-------|------|------|------|
| wild  | 0.51 | 0.61 | 0.6  |
| SA    |      | 0.11 | 0.13 |
| SEA1  |      |      | 0.02 |

**Table S3.** Significant pericarp color-associated SNPs identified through GWAS.

| Chromosome | Pos      | -log (P)    |
|------------|----------|-------------|
| chr6       | 27295224 | 14.58981347 |
| chr6       | 27295812 | 12.64206515 |
| chr6       | 27295890 | 12.68020711 |
| chr6       | 27296174 | 11.90893127 |
| chr6       | 27296380 | 12.19621524 |
| chr6       | 27296447 | 12.19621524 |
| chr6       | 27296544 | 11.70958694 |
| chr6       | 27296674 | 14.59904777 |
| chr6       | 27297065 | 13.8158198  |
| chr6       | 27297120 | 10.7101436  |
| chr6       | 27297142 | 11.42495078 |
| chr6       | 27297776 | 12.31661071 |
| chr6       | 27297951 | 10.72939103 |
| chr6       | 27298114 | 12.19621524 |
| chr6       | 27298245 | 11.65183148 |
| chr6       | 27298454 | 12.06326012 |
| chr6       | 27301330 | 10.58387563 |
| chr6       | 27304059 | 17.47180344 |
| chr6       | 27304165 | 18.12089265 |
| chr6       | 27304199 | 15.43527477 |
| chr6       | 27304449 | 15.45531198 |
| chr6       | 27304666 | 17.53659979 |
| chr6       | 27305646 | 19.93531743 |
| chr6       | 27305664 | 18.48748904 |
| chr6       | 27305726 | 20.6298016  |
| chr6       | 27305805 | 18.68141499 |
| chr6       | 27305846 | 18.18950537 |
| chr6       | 27305916 | 19.07236278 |
| chr6       | 27306119 | 22.11940933 |
| chr6       | 27306304 | 22.11940933 |
| chr6       | 27306441 | 20.05146478 |
| chr6       | 27306450 | 22.11940933 |
| chr6       | 27306665 | 21.00493107 |
| chr6       | 27307230 | 24.49555632 |
| chr6       | 27307441 | 12.08186477 |
| chr6       | 27307512 | 24.49555632 |
| chr6       | 27307528 | 22.13151426 |
| chr6       | 27307602 | 21.80779507 |
| chr6       | 27307968 | 10.53884677 |
| chr6       | 27308109 | 16.34691297 |
| chr6       | 27312505 | 12.11570887 |

**Table S4.** Primer used in this study.

| Primer ID |         | Primers(5'-3')                         | Purpose                                                         |
|-----------|---------|----------------------------------------|-----------------------------------------------------------------|
| McAPRR2_1 | Forward | CCAAGAAGAGGCGAAAACATGACC               | Primer used to amplification of<br><i>McAPRR2</i> coding region |
|           | Reverse | TATTTAATAAACATTATACAGACAGAGGG<br>TGTGG |                                                                 |
| McAPRR2_2 | Forward | TGTTGTTGGCCTTGTGACTG                   | Primers used for qRT-PCR<br>analysis of <i>McAPRR2</i>          |
|           | Reverse | CCCAATCGGATAAGCCTCAG                   |                                                                 |
| Mc18SDL1F | Forward | ACCGAACCCATGTTCCTC                     | Reference gene for <i>McAPRR2</i><br>qRT-PCR analysis           |
|           | Reverse | CAAGCACGGAAGAAAATCGAA                  |                                                                 |
